# Supplementary material for: An evolutionary approach to systematic discovery of novel deubiquitinases, applied to Legionella
Source: Life Sci Alliance. 2020 Jul 27;3(9):e202000838. doi: 10.26508/lsa.202000838 (PMC7391069; doi:10.26508/lsa.202000838)
Supplement: Supplementary file 3 [file LSA-2020-00838_TableS1.xlsx]

## Sheet: Sheet1
	GG-cleaving DUB or UBL-protease	unclear	no GG-cleaving DUB or UBL protease
Conserved aromatic Motif	c05; c101; c115; c12; c19; c63; c64; c65; c67; c79; c85a; c85b; c86; c87; c48; c98; ChlaDUB; CidB; LotA; MINDY34; RavD; RickCE; SidE; (23)	c03e; c09; c33; c36 (4)	c39; c57 (2)
partially conserved		c03d; c03g; c16b; c21; (4)	c45; c55; c71; c83 (4)
No conserved aromatic motif	c76; ZUFSP (2)		c01a; c01b; c02a; c03a; c03b; c03c; c03f; c03h; c04; c06; c07; c08; c10; c100; c102; c104; c105; c107; c108; c11; c110; c116; c118; c11a; c11b; c13; c14a; c14b; c15; c16a; c18; c23; c24; c25; c26; c27; c28; c30; c31; c32; c37; c40; c42; c44; c46; c47; c50; c51; c53; c54; c56; c58a; c58b; c59; c60a; c60b; c62; c66; c69; c70; c74; c75; c78; c80; c82; c82a; c82b; c84; c89; c93; c95; c96; c97; c99; A…
Table S1. Conserved aromatic motif is enriched in GG-cleaving deubiquitinases and UBL-proteases. The conservation of an aromatic motif immediately following the catalytic histidine residue was scored for all cysteine-protease families shown in Fig 1. The aromatic motif was counted as “conserved” if more than 90% of the family members have a Trp, Tyr or Phe residue at this position. In some famili…
